# Supplementary material
Source: PubMed Central journal article supplement (PMC5462056)
Supplement: supp_pp.17.00220_PP2017-RR-00220DR2_Supplemental_figure_1.pdf [file supp_pp.17.00220_PP2017-RR-00220DR2_Supplemental_figure_1.pdf]

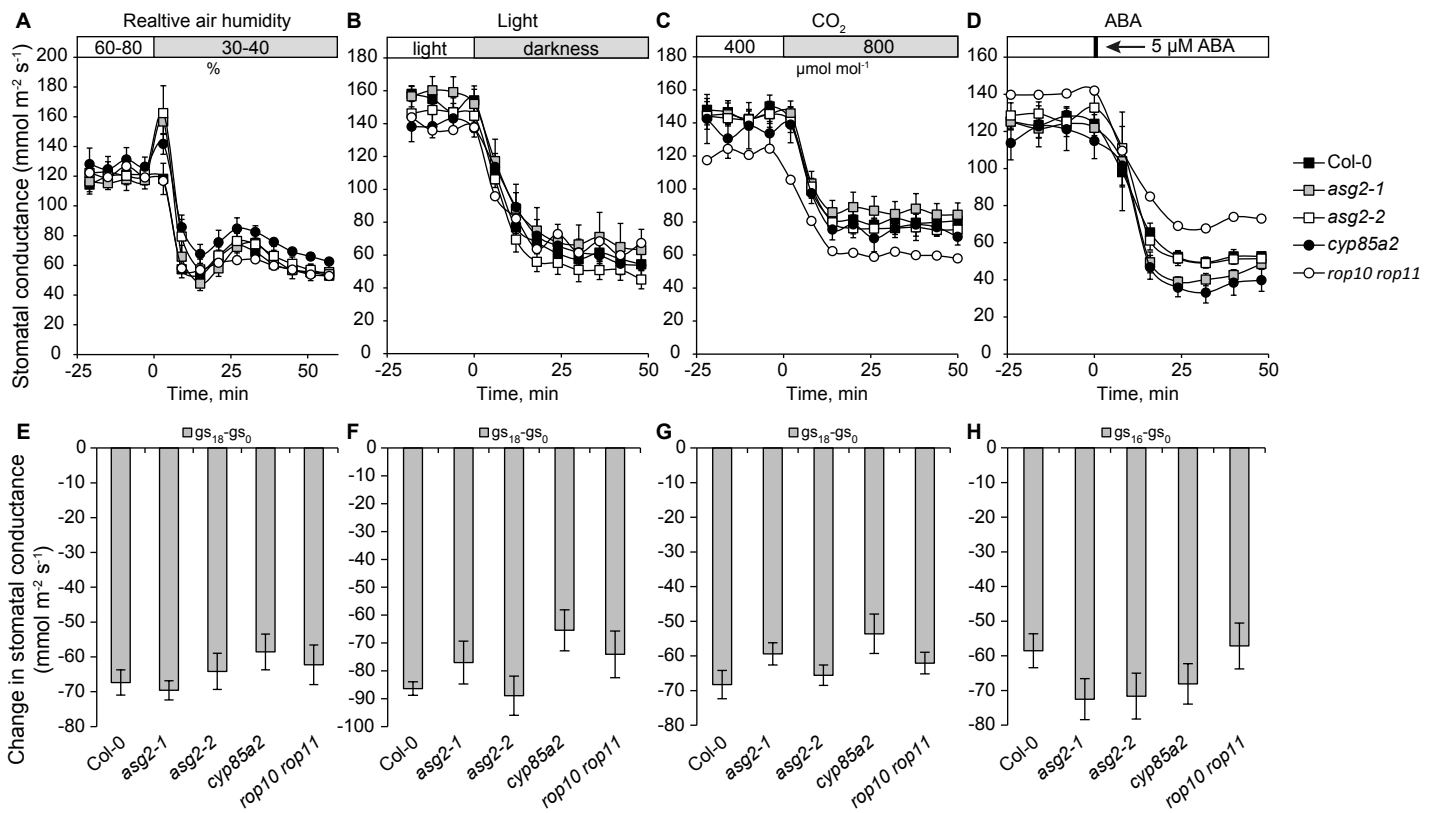

**Supplemental Figure 1. Stomatal responses of *asg2-1*, *asg2-2*, *cyp85a2* and *rop10 rop11*.**

(A-D) Time courses of stomatal conductances in response to reduced air humidity, darkness, elevated CO<sub>2</sub> and ABA treatment (n=5-7), respectively. (E-H) Changes in stomatal conductance values.
