# Supplementary material
Source: PubMed Central journal article supplement (PMC5462056)
Supplement: supp_pp.17.00220_PP2017-RR-00220DR2_Supplemental_Figure_3.pdf [file supp_pp.17.00220_PP2017-RR-00220DR2_Supplemental_Figure_3.pdf]

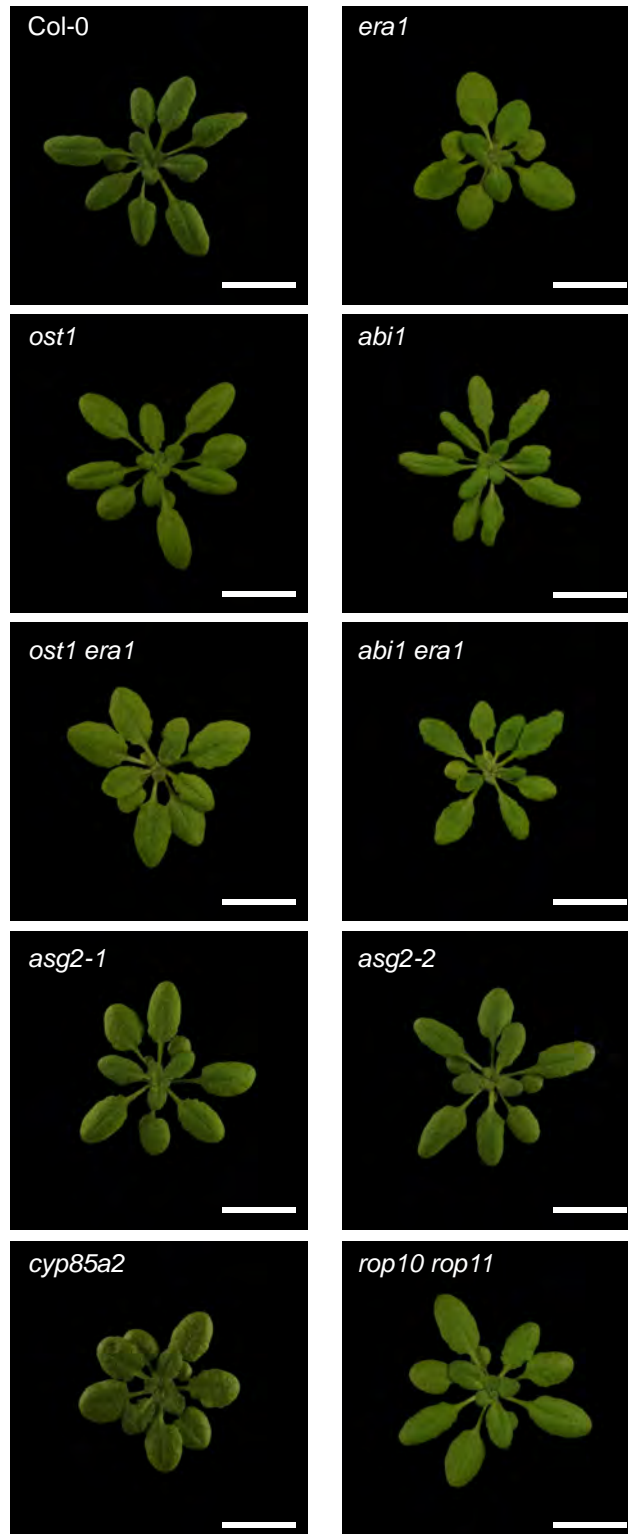

**Supplemental Figure 3.** Representative photos of mutants and Col-0 wild type used for whole-plant gas exchange experiments, plants are 26-30 days old. Scale bar indicates 2 cm.
